# Supplementary material
Source: PubMed Central journal article supplement (PMC6983841)
Supplement: supp_RA119.011549_156587_3_supp_442848_q2cszf.pdf [file supp_RA119.011549_156587_3_supp_442848_q2cszf.pdf]

## Supporting Information

Cultivation at high osmotic pressure confers ubiquinone 8-independent protection of respiration on *Escherichia coli*

**Laura Tempelhagen<sup>‡</sup>, Anita Ayer<sup>§,¶</sup>, Doreen E. Culham<sup>‡</sup>, Roland Stocker<sup>§,¶</sup> and Janet M Wood<sup>‡</sup>**

From the <sup>‡</sup>Department of Molecular and Cellular Biology, University of Guelph, Guelph, ON N1G 2W1, Canada; <sup>§</sup>Vascular Biology Division, Victor Chang Cardiac Research Institute, Darlinghurst, NSW 2010, Australia; and <sup>¶</sup>St Vincent's Clinical School, University of New South Wales Medicine, NSW 2050, Australia

<sup>1</sup>Supported by an Undergraduate Student Research Award and a Postgraduate Scholarship from the Natural Sciences and Engineering Research Council of Canada.

<sup>2</sup>To whom correspondence should be addressed: Janet M. Wood, Department of Molecular and Cellular Biology, University of Guelph, 488 Gordon St., Guelph, ON N1G 1Y2 Canada; [jwood@uoguelph.ca](mailto:jwood@uoguelph.ca); Tel. (519) 824-4120

**Table S1.** Deletion of *ubiG* impairs ProP and LacY activity in *E. coli*.

**Table S2.** Osmolality response parameters of His<sub>6</sub>-ProP in proteoliposomes.

**Table S3.** Oligonucleotide primers.

**Figure S1.** Representative growth curves

**Figure S2.** The growth of wild type *E. coli* and of *E. coli* BW25113 under osmotic stress is similarly impaired by a *ubiG* defect.

**Figure S3.** Expression of *ubiG* from pLT1 does not require arabinose induction.

**Figure S4.** CL is not required for osmotolerance or respiratory protection.

**Figure S5.** TLC analysis of intracellular trehalose

**Table S1**  
**Deletion of *ubiG* impairs ProP and LacY activity in *E. coli*<sup>1</sup>**

| Strain | Relevant Genotype        | Replicate Experiment | Osmolality Response Parameter: ProP        |                                |               | Osmolality Dependence: LacY                    |                                         |
|--------|--------------------------|----------------------|--------------------------------------------|--------------------------------|---------------|------------------------------------------------|-----------------------------------------|
|        |                          |                      | A <sub>max</sub><br>nmol/min/mg<br>protein | Π <sub>1/2</sub> /RT<br>mol/kg | B<br>mol/kg   | Slope (m)<br>(nmol/min/mg<br>protein)/(mol/kg) | Intercept (b)<br>nmol/min/mg<br>protein |
| WG709  | <i>ubiG</i> <sup>+</sup> | 1                    | 103 ± 4                                    | 0.241 ± 0.005                  | 0.046 ± 0.005 | 4.7 ± 0.5                                      | 6.6 ± 1.8                               |
|        |                          | 2                    | 102 ± 3                                    | 0.236 ± 0.005                  | 0.044 ± 0.004 | 9.3 ± 1.7                                      | 2.1 ± 0.5                               |
| WG1542 | <i>ΔubiG785::kan</i>     | 1                    | 11 ± 1                                     | 0.249 ± 0.016                  | 0.066 ± 0.011 | -0.3 ± 0.9                                     | 1.1 ± 0.3                               |
|        |                          | 2                    | 16 ± 1                                     | 0.247 ± 0.012                  | 0.080 ± 0.008 | -0.8 ± 0.8                                     | 1.3 ± 0.2                               |

<sup>1</sup>Bacteria were cultivated, initial rates of proline or lactose uptake were measured, and data were analyzed as described in Experimental Procedures and illustrated in Figure 3.

**Table S2**  
**Osmolality response parameters of ProP-His<sub>6</sub> in proteoliposomes**

| Supplementary<br>Q8 | Replicate | Osmolality Response Parameter           |                                |             |
|---------------------|-----------|-----------------------------------------|--------------------------------|-------------|
|                     |           | A <sub>max</sub><br>nmol/min/mg protein | Π <sub>1/2</sub> /RT<br>mol/kg | B<br>mol/kg |
| None                | 1         | 893 ± 66                                | 0.47 ± 0.02                    | 0.09 ± 0.02 |
|                     | 2         | 860 ± 35                                | 0.44 ± 0.01                    | 0.07 ± 0.01 |
| 1 % (w/w)           | 1         | 1009 ± 73                               | 0.47 ± 0.02                    | 0.10 ± 0.02 |
|                     | 2         | 838 ± 67                                | 0.44 ± 0.03                    | 0.10 ± 0.02 |

<sup>1</sup>PRLs were prepared without or with Q8 supplementation, initial rates of proline uptake were measured, and data were analyzed as described in Experimental Procedures and illustrated in Figure 6.

**Table S3.**  
**Oligonucleotide primers**

| Primer Pair                      | Primer Sequence (5' to 3')                                                         | Application                                                                                     |
|----------------------------------|------------------------------------------------------------------------------------|-------------------------------------------------------------------------------------------------|
| 80-01<br>80-02                   | GGAAGCTTCCGGGGCCAATGCTCGAGGAAATCTT<br>GGAAGCTTCTCCGTTAACCTGGAGGAGAGTATGC           | PCR: presence or absence of <i>proP</i>                                                         |
| ProW2<br>ProW3                   | GGTGATAATGCCCGGCGTCAG<br>GGACCAACAGTATGTCGGCATC                                    | PCR: presence or absence of <i>proW</i>                                                         |
| betT3<br>betT5                   | GTGGCGTCGATCAGTTGTC<br>CGCCATATGCAGACATGGC                                         | PCR: presence or absence of <i>betT</i>                                                         |
| cls-For<br>cls-Rev               | CGCTGACCAGTGCTTTTCC<br>GCTGGATCGAGATTGTCGG                                         | PCR: presence or absence of <i>clsA</i>                                                         |
| otsA-1<br>otsA-2<br>otsA-3       | GGCACAGGTGCAACTCAGG<br>GCCTACGGTGAGTTAAGCG<br>CGC AAT TTG CGG GAG CGG              | PCR: presence or absence of <i>otsA</i>                                                         |
| KmF<br>ubiG-rev                  | GATCTCCTGTCATCT<br>CAC TGT CTA GTC GGC ACG G                                       | PCR: presence of <i>ΔubiG785::kan</i>                                                           |
| ubiG-for<br>ubiG-int<br>ubiG-rev | GCT ATC CCT CTA CTG TAT CC<br>GGT GGG ATC TGG AAG GTG<br>CAC TGT CTA GTC GGC ACG G | PCR: presence or absence of <i>ubiG</i>                                                         |
| ubiGus<br>ubiGds                 | GAT <b>CCATGG</b> ATGCCGAAAAATCG<br>CCCA <b>AGCTTT</b> CACTTATTCTGCG               | PCR amplification of <i>ubiG</i> , adding <i>NcoI</i> and <i>HindIII</i> sites ( <b>bold</b> ). |
| pBADfor<br>pBADrev               | CCA TAA GAT TAG CGG ATC CTA CC<br>CTG AGC CTT TCG TTT TAT TTG ATG CC               | Sequencing to verify insertion of <i>ubiG</i> into pBAD24                                       |

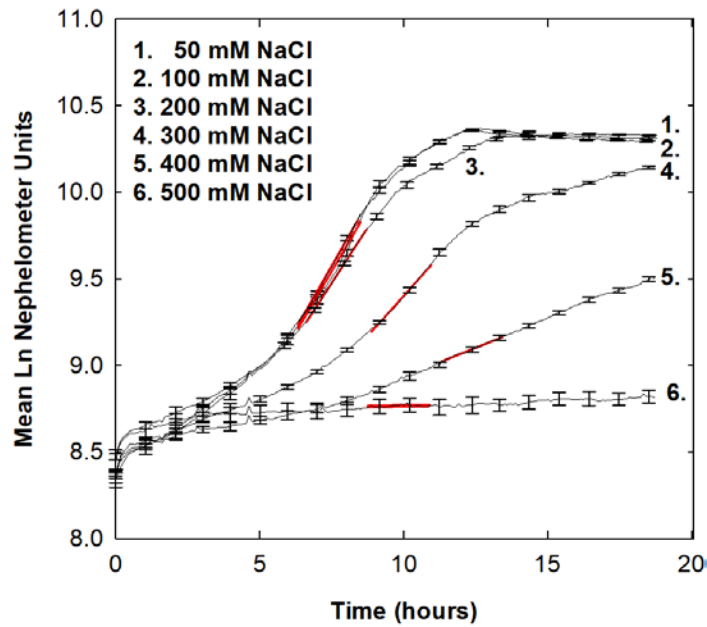

**Figure S1.**  
**Representative growth curves.**

*Escherichia coli* strain WG1230 was cultivated in MOPS medium containing NaCl at the indicated concentrations, growth was monitored with a Nephelostar microplate nephelometer (BMG Labtech, Ortenberg, Germany) and growth rates were determined as described in Methods. The resulting, red regression lines yielded the growth rates shown in Figure 2 (Panel A, strain WG1230 (*ubiG*<sup>+</sup>) without glycine betaine (GB)).

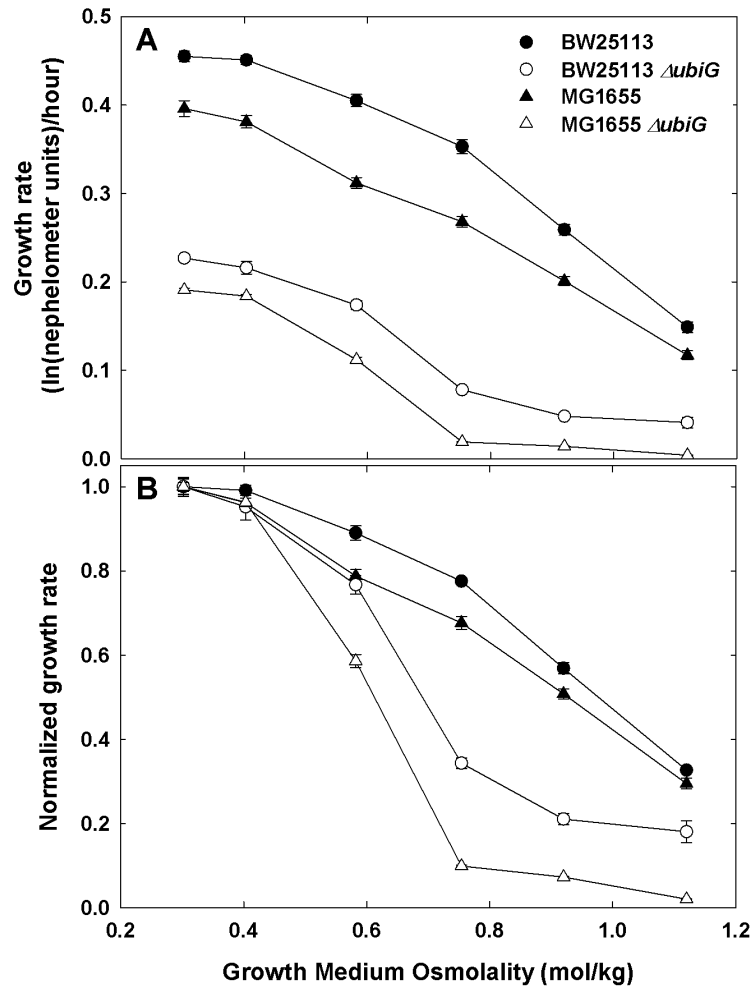**Figure S2.****Impact of a *ubiG* defect on the growth of wild type *E. coli* and *E. coli* BW25113.**

Growth rates of *E. coli* strains belonging to the Keio collection (BW25113 (*ubiG*<sup>+</sup>) and JW2226 ( *$\Delta ubiG785::kan$* ), circles) and those based on wild type *E. coli* (MG1655 (*ubiG*<sup>+</sup>) and WG1533 ( *$\Delta ubiG785::kan$* ), triangles) were cultivated in M9 medium under osmotic stress, growth rates were determined and data were analyzed as described in the legend for Figure 1. Panel A: Solid symbols illustrate the growth rates of *ubiG*<sup>+</sup> strains (BW25113 and MG1655), while open symbols illustrate the growth rates of  *$\Delta ubiG785::kan$*  strains (JW2226 and WG1533). The osmolalities of the media were adjusted by adding NaCl (50 mM - 500 mM). Means  $\pm$  standard error of four replicate measurements from one of two replicate experiments are shown. In panel B, each growth rate is normalized with respect to the mean growth rate observed at the lowest osmolality.

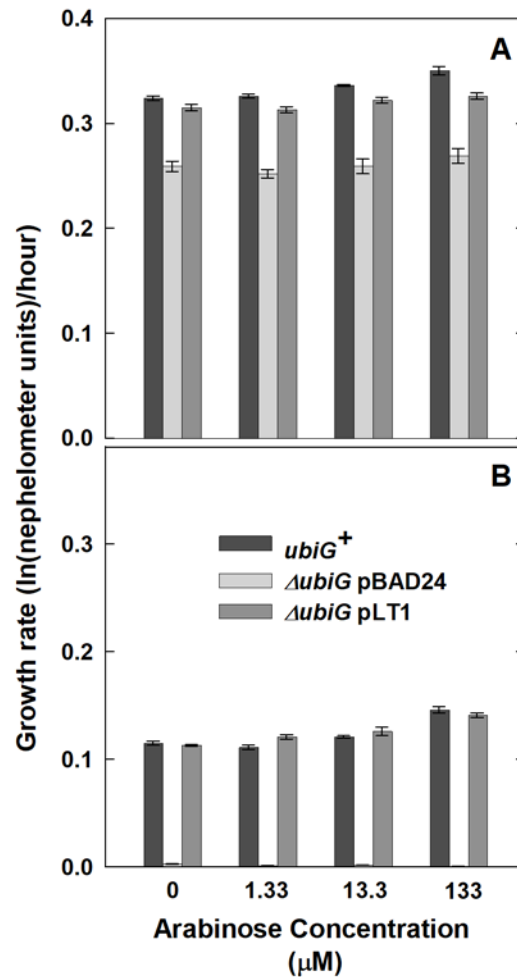**Figure S3.****Expression of *ubiG* from pLT1 does not require arabinose induction.**

The growth rates of *E. coli* strains MG1655 (*ubiG*<sup>+</sup>, black bars), WG1590 (MG1655  $\Delta ubiG785::kan$  pBAD24, light grey bars) and WG1591 (MG1655  $\Delta ubiG785::kan$  pLT1, dark grey bars) in NaCl-free MOPS media without or with arabinose (1.33 μM, 13.3 μM, and 133 μM) and with 50 mM NaCl (the low osmolality medium, panel A) or 500 mM NaCl (the high osmolality medium, panel B) were determined and the data were analyzed as described in the legend to Figure 1.

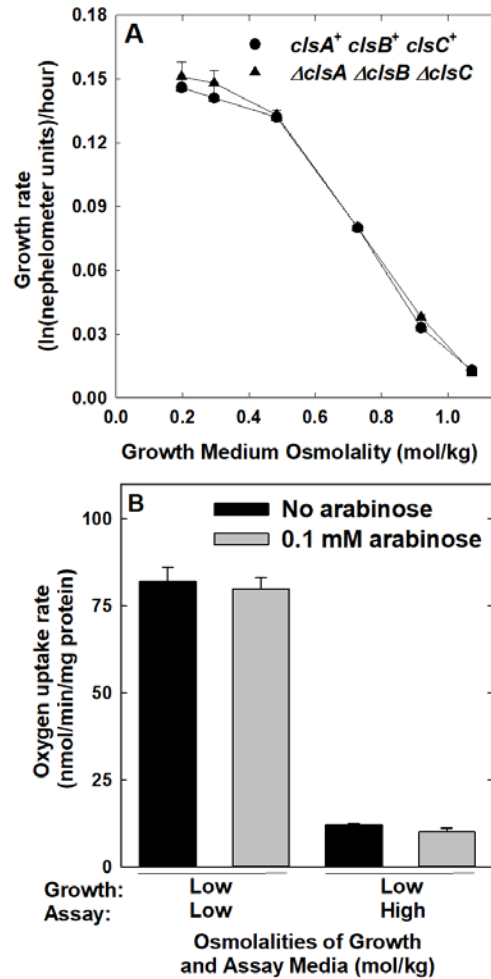

**Figure S4.**

**CL is not required for osmotolerance or respiratory protection**

**Panel A:** The growth rates of *E. coli* strains W3110 (wild type, circles) and BKT12 (W3110  $\Delta clsA856::FRT \Delta clsB861::FRT \Delta clsC788::kan$ , triangles) in NaCl-supplemented MOPS media of the indicated osmolalities were determined and the data were analyzed as described in the legend to Figure 1.

**Panel B:** *E. coli* strain WG1610 (MG1655 pDC347) was cultivated in low osmolality MOPS medium, without (black bars) or with (grey bars) arabinose (0.1 mM), and oxygen uptake was measured in low and high osmolality MOPS media as described in the legend to Figure 4.



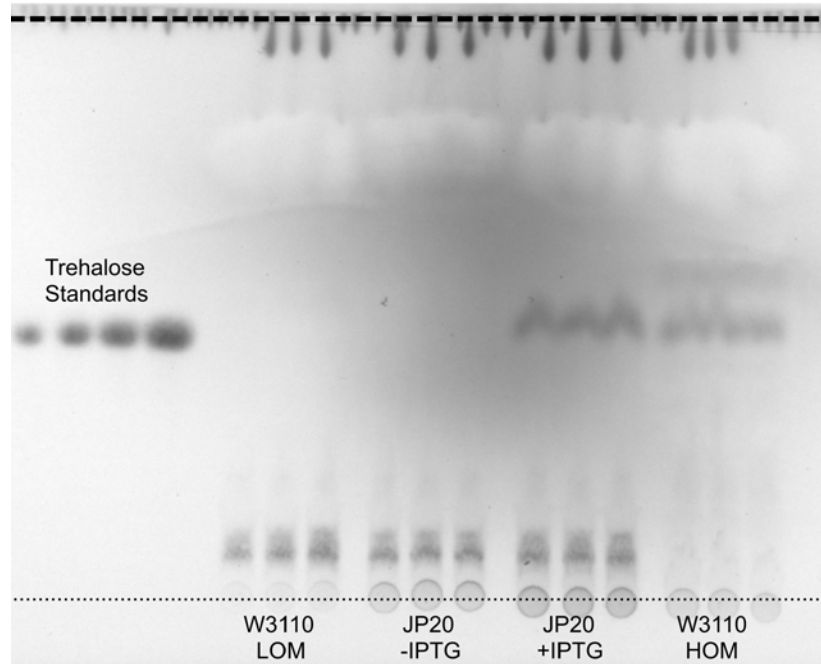

### Figure S5

#### TLC analysis of intracellular trehalose

Cell extracts from *Escherichia coli* strain W3110 (wild type) grown in low (LOM) or high (HOM) osmolality NaCl-supplemented MOPS medium, and strain JP20 (W3110  $\Delta$ otsBA::*FRT*  $\Delta$ treA::*FRT*  $\Delta$ treC::*FRT*  $\Delta$ treF::*FRT* *FampH*::*lacI-Ptac*-otsBA::*FRT*) grown in LOM with or without IPTG (0.1 mM) were prepared, and the TLC was performed as described in Experimental Procedures. Triplicate measurements from one of two experiments are shown. Authentic trehalose standards (5 nmol, 10 nmol, 15 nmol, and 20 nmol) were used for the identification and quantification of trehalose. The plate origin and solvent front are indicated by the dotted and dashed line, respectively. The  $R_f$  value for trehalose was 0.41.
